# Supplementary material
Source: publisher figshare collection journal article supplement (https://diabetesjournals.figshare.com/articles/dataset/_/14125511)
Supplement: Supplementary file 1 [file 1]

**Supplementary Table 1. Primer Sequences**

| <b>Gene</b>     | <b>Forward</b>         | <b>Reverse</b>         |
|-----------------|------------------------|------------------------|
| <i>βActin</i>   | ACCGTGAAAAGATGACCCAG   | GTACGACCAGAGGCATACAG   |
| <i>Cdkn1a</i>   | GCAGATCCACAGCGATATCC   | CAACTGCTCACTGTCCACGG   |
| <i>Cdkn2a</i>   | CCCAACGCCCCGA ACT      | GCAGAAGAGCTGCTACGTGAA  |
| <i>Gstp1</i>    | TGCCATCTTGAGACACCTTG   | GTTGGTGTAGATGAGGGTGAC  |
| <i>Gdf15</i>    | TCCCCACCTGTATCGCTC     | TCTGTCCTGTGCATAAGAACC  |
| <i>Dusp3</i>    | GCTAGTTATCGCCTACCTCATG | CTCCTTGGCTAGTCTGTCATTG |
| <i>Hsp90aa1</i> | ATCCCCGTGCTGTATTGTC    | TCTCCAGGTGTTTCTTTGCTG  |
| <i>Ing1</i>     | AAGCACACCAGGACATCAG    | GATTCTCATTGTTTCGCTGCC  |
| <i>Kpnb1</i>    | ATCACATTGCTGGAGATGAGG  | TCCGCCCTTCAGTTAATAGTTC |

**Supplementary Table 2. Antibodies used for immunostaining**

| <b>Antibody</b>                | <b>Source</b>                       | <b>Catalog Number</b> | <b>Concentration</b> |
|--------------------------------|-------------------------------------|-----------------------|----------------------|
| Anti-Insulin                   | Abcam                               | Ab195956              | 1:200                |
| Anti-HMGB1                     | BioVision                           | A1005-50              | 1:400                |
| Anti-Ki67                      | Abcam                               | Ab15580               | 1:500                |
| 488 Donkey anti-Guinea Pig IgG | Jackson ImmunoResearch Laboratories | 706-545-148           | 1:200                |
| 594 Donkey anti-Rabbit IgG IgG | Jackson ImmunoResearch Laboratories | 711-585-152           | 1:200                |

**Supplementary Table 3. Viability of β-Cells by Experiment**

| <b>Experiment #</b> | <b>Proportion PI-negative (%)</b> |              |
|---------------------|-----------------------------------|--------------|
|                     | <b>βgal-</b>                      | <b>βgal+</b> |
| 1                   | 86                                | 86           |
| 2                   | 80                                | 74           |

|   |    |    |
|---|----|----|
| 3 | 80 | 86 |
| 4 | 82 | 77 |
| 5 | 87 | 78 |
| 6 | 89 | 81 |

**Supplementary Table 4. Viability of MIN6 Cells by Experiment**

| Passage # | Proportion PI-negative (%) |           |
|-----------|----------------------------|-----------|
|           | Control                    | Bleomycin |
| 33        | 63                         | 64        |
| 34        | 45                         | 40        |
| 34        | 42                         | 40        |
| 39        | 42                         | 51        |
| 40        | 33                         | 40        |
| 40        | 41                         | 38        |

**Supplementary Table 5. Proteomic Results for Core SASP Factors Described in the Literature**

| Protein     | Bgal p-value | MIN6 p-value | Bgal Log2FC | MIN6 Log2FC |
|-------------|--------------|--------------|-------------|-------------|
| IL1A        | 0.079        | 0.362        | 0.054       | 0.042       |
| IL6         | 0.267        | 0.072        | -0.261      | 0.278       |
| CCL2        | 0.169        | 0.004        | 0.051       | 0.111       |
| CCL3        | 0.882        | 0.091        | 0.004       | -0.042      |
| CCL5        | 0.353        | 0.000        | -0.051      | -0.204      |
| CXCL10      | 0.849        | 0.008        | -0.021      | 0.191       |
| CXCL1       | 0.040        | 0.090        | 0.196       | 0.096       |
| CTSB        | 0.395        | 0.581        | -0.093      | -0.078      |
| CXCL3 CXCL2 | 0.011        | 0.045        | 0.171       | 0.209       |
| FGF2        | 0.120        | 0.001        | -0.125      | -0.107      |

|                         |       |       |        |        |
|-------------------------|-------|-------|--------|--------|
| IGFBP3                  | 0.336 | 0.143 | -0.092 | -0.061 |
| IGFBP5                  | 0.573 | 0.000 | 0.097  | -0.877 |
| LAMA1<br>LAMB1<br>LAMC1 | 0.037 | 0.005 | 0.188  | 0.306  |
| NGF                     | 0.402 | 0.020 | -0.047 | -0.128 |
| PLAU                    | 0.613 | 0.009 | -0.114 | 0.111  |
| SERPINE1                | 0.278 | 0.067 | -0.159 | 0.186  |
| VEGFA                   | 0.189 | 0.000 | 0.562  | -0.957 |

**Supplementary Table 6. Proteomic results for 3 SASP factors characteristic of other tissues as described in the literature**

| Cell type      | Species         | SASP Factor | Condition                |                          | Change direction |
|----------------|-----------------|-------------|--------------------------|--------------------------|------------------|
|                |                 |             | $\beta$ Gal <sup>-</sup> | $\beta$ Gal <sup>+</sup> |                  |
| $\beta$ -cells | Mouse           | IL1A        | 100%                     | 104%                     | Increase         |
|                |                 | IL1B        | 100%                     | 123%                     | Increase         |
|                |                 | IL6         | 100%                     | 83%                      | Decrease         |
|                | Human           | IL1A        | 100%                     | 105%                     | Increase         |
|                |                 | IL1B        | 100%                     | 102%                     | Increase         |
|                |                 | IL6         | 100%                     | 94%                      | Decrease         |
|                |                 |             | <b>Control</b>           | <b>Bleomycin</b>         |                  |
| MIN6           | Mouse cell line | IL1A        | 100%                     | 103%                     | Increase         |
|                |                 | IL1B        | 100%                     | 115%                     | Increase         |
|                |                 | IL6         | 100%                     | 121%                     | Increase         |

**Supplementary Table 7. Relative expression levels of different islet hormones used to identify different islet subpopulations in scRNASeq analysis.**

|      | alpha C | alpha S | alpha SR | beta C | beta S | beta SR | delta C | delta S | delta SR | pp C | pp S | pp SR |
|------|---------|---------|----------|--------|--------|---------|---------|---------|----------|------|------|-------|
| Ins2 | 7.2     | 3.73    | 6.47     | 11.5   | 11.7   | 11.5    | 7.27    | 3.16    | 6.48     | 7.87 | 4.01 | 7.15  |
| Ins1 | 5.57    | 2.16    | 4.9      | 9.98   | 10.2   | 9.95    | 5.73    | 1.9     | 4.97     | 6.08 | 2.48 | 5.55  |
| Gcg  | 11.2    | 11.1    | 11.2     | 1.27   | 1.08   | 1.27    | 1.39    | 1.09    | 1.02     | 2.78 | 1.99 | 2.47  |
| Sst  | 0.554   | 0.257   | 0.402    | 0.416  | 0.284  | 0.362   | 9.47    | 9.56    | 9.45     | 2.19 | 1.73 | 2.28  |
| Ppy  | 2.32    | 1.96    | 2.52     | 1.19   | 0.853  | 0.834   | 3.21    | 2.45    | 2.71     | 10.2 | 10.1 | 9.96  |

C= control, S =S961, SR= S961 then 2 weeks recovery

### Supplementary Figure 1. Bleomycin-induced DNA damage as an *in vitro* model of $\beta$ -cell senescence.

(A) Workflow for inducing senescence in MIN6 cells. MIN6 cells were cultured and treated with 50  $\mu$ M bleomycin for 48 hours, followed by 3-4 days of culture in regular MIN6 media, to induce senescence.

(B) Bleomycin treatment induced a two-fold increase in *Cdkn1a* expression in MIN6 cells compared to the control cells. Results show mean  $\pm$  SEM; \*  $p = 0.03$ ;  $n = 6$  (Paired t-test).

(C) Bleomycin treatment significantly increased the percentage of MIN6 cells that exhibited SA- $\beta$ gal activity. MIN6 samples with higher passage number exhibited higher proportion of  $\beta$ gal<sup>+</sup> cells. \*  $p = 0.015$  (Paired t-test).

(D) Nuclear HMGB1 staining decreased in cells treated with bleomycin. Cumulative frequency graph showed a decrease in the percentage of cells that had nuclear staining and an overall decrease in staining intensity.

(E) Micrograph showing a local decrease of Ki67 staining as proliferation marker in MIN6 cells treated with bleomycin.

(F) Micrograph of DAPI stained nuclei showing a significant increase of nucleus areas after treatment with bleomycin. This is a well-known morphological change of senescence.

(G) qPCR results for *Cdkn1a* and *Cdkn2a* mRNA expression in untreated MIN6 cells after days in culture supporting the capacity of immortalized cell lines to enter senescence;  $n=5$ , \* $p<0.05$

(H) Normalized values of SA- $\beta$ Gal activity of different passages of MIN6 cells shows a significant increase of paired  $\beta$ Gal<sup>+</sup> cells with higher passages. This supports the capacity of subpopulations MIN6 cells produce SASP.

**Supplementary Figure 2.** Bleomycin treated MIN6 cells timecourse expression of individual genes qPCR data shown in **Fig. 2B**. Red bars are statistically significantly different ( $p<0.05$ ) than time 0;  $n=5$ .

**Supplementary Figure 3.** Transcriptional expression of the complete SASP signature in  $\beta$ -cells from animals with insulin resistance. Heatmap showing average expression levels by scRNA-seq. Expression levels are shown as the log of the fold change from overall average, and the midpoint of 0 represents average expression across all samples.

**Supplementary Figure 4.** Heatmap showing expression of all  $\beta$ -cell SASP targets in each cluster. Expression levels are shown as z-scores, and the midpoint of 0 represents average expression across all samples. Cluster 4 did not appear in the control group, so all control cluster 4 squares are marked in black.
